1 ***Exposing hidden alternative backbone conformations***  
2 ***in X-ray crystallography using qFit***  
3

4 Daniel A. Keedy<sup>1</sup>, James S. Fraser<sup>1</sup>, Henry van den Bedem<sup>2\*</sup>

5  
6 <sup>1</sup> - Department of Bioengineering and Therapeutic Sciences, University of California, San Francisco,  
7 San Francisco, California, United States of America

8 <sup>2</sup> - Division of Biosciences, SLAC National Accelerator Laboratory, Stanford University, California,  
9 United States of America

10 \* corresponding author

11 Email: [vdbedem@slac.stanford.edu](mailto:vdbedem@slac.stanford.edu) (HvdB)

12  
13 **Abstract**

14 Proteins must move between different conformations of their native ensemble to perform their  
15 functions. Crystal structures obtained from high-resolution X-ray diffraction data reflect this  
16 heterogeneity as a spatial and temporal conformational average. Although movement between natively  
17 populated alternative conformations can be critical for characterizing molecular mechanisms, it is  
18 challenging to identify these conformations within electron density maps. Alternative side chain  
19 conformations are generally well separated into distinct rotameric conformations, but alternative  
20 backbone conformations can overlap at several atomic positions. Our model building program qFit uses  
21 mixed integer quadratic programming (MIQP) to evaluate an extremely large number of combinations of  
22 sidechain conformers and backbone fragments to locally explain the electron density. Here, we  
23 describe two major modeling enhancements to qFit: peptide flips and alternative glycine conformations.  
24 We find that peptide flips fall into four stereotypical clusters and are enriched in glycine residues at the  
25  $n+1$  position. The potential for insights uncovered by new peptide flips and glycine conformations is  
26 exemplified by HIV protease, where different inhibitors are associated with peptide flips in the “flap”  
27 regions adjacent to the inhibitor binding site. Our results paint a picture of peptide flips as  
28 conformational switches, often enabled by glycine flexibility, that result in dramatic local  
29 rearrangements. Our results furthermore demonstrate the power of large-scale computational analysis  
30 to provide new insights into conformational heterogeneity. Overall, improved modeling of backbone  
31 heterogeneity with high-resolution X-ray data will connect dynamics to the structure-function  
32 relationship and help drive new design strategies for inhibitors of biomedically important systems.

33  
34 **Author Summary**

35 Describing the multiple conformations of proteins is important for understanding the relationship  
36 between molecular flexibility and function. However, most methods for interpreting data from X-ray  
37 crystallography focus on building a single structure of the protein, which limits the potential for biological  
38 insights. Here we introduce an improved algorithm for using crystallographic data to model these  
39 multiple conformations that addresses two previously overlooked types of protein backbone flexibility:  
40 peptide flips and glycine movements. The method successfully models known examples of these types  
41 of multiple conformations, and also identifies new cases that were previously unrecognized but are well  
42 supported by the experimental data. For example, we discover glycine-driven peptide flips in the  
43 inhibitor-gating “flaps” of the drug target HIV protease that were not modeled in the original structures.  
44 Automatically modeling “hidden” multiple conformations of proteins using our algorithm may help drive  
45 biomedically relevant insights in structural biology pertaining to, e.g., drug discovery for HIV-1 protease  
46 and other therapeutic targets.

47

## 48 Introduction

49 Even well-folded globular proteins exhibit significant flexibility in their native state [1]. However, despite  
50 advances in nuclear magnetic resonance dynamics experiments and computational simulations,  
51 accurately characterizing the nature and extent of biomolecular flexibility remains a formidable  
52 challenge [2]. While traditionally X-ray crystallography is associated with characterizing the ground  
53 state of a biomolecule, the ensemble nature of diffraction experiments means that precise details of  
54 alternative conformations can be accessed when the electron density maps are of sufficient quality and  
55 resolution [3]. These maps represent spatiotemporal averaged electron density from conformational  
56 heterogeneity across the millions of unit cells within a crystal [4, 5].

57

58 Computational methods have made strides toward uncovering and modeling conformational  
59 heterogeneity in protein structures from crystallographic data [3]. However, there is currently no  
60 automated approach to recognize the features of extensive backbone flexibility in electron density  
61 maps, model the constituent alternative conformations, and validate that the incorporation of  
62 heterogeneity improves the model. B-factors theoretically model harmonic displacements from the  
63 mean position of each atom, but in practice are often convolved with occupancies of discrete alternative  
64 positions when multiple backbone conformations partially overlap [5]. Statistical analyses of electron  
65 density using Ringer has revealed evidence for a surprising number of “hidden” alternative  
66 conformations in electron density maps [6, 7]. The phenix.ensemble\_refinement method [8] uses  
67 electron density to bias molecular dynamics simulations, then assembles snapshots from this trajectory  
68 into a multi-copy ensemble model. However, energy barriers of the simulation may prevent sampling of  
69 well separated backbone conformations. Accurately modeling protein conformational heterogeneity, in  
70 particular when the mainchain adopts distinct conformations for one or a number of contiguous  
71 residues, remains a difficult task. The spatial overlap of electron density of multiple conformations and  
72 the relatively similar profiles of branching mainchain and sidechains blur structural features that can  
73 guide the human eye to reduce the large number of possible interpretations [9].

74

75 We have previously developed qFit [10], a method for automatically disentangling and modeling  
76 alternative conformations and their associated occupancies, which are represented by the variable  $q$   
77 (for “occupancy”) in standard structure factor equations. The qFit algorithm examines a vast number of  
78 alternative interpretations of the electron density map simultaneously. To propitiously explore a high-  
79 dimensional search space, conformational sampling is guided by the anisotropy of electron density at  
80 the C $\beta$  atom position, the nexus of backbone and sidechain in polypeptides [11]. For each slightly  
81 shifted C $\beta$  atom position, qFit samples sidechain conformations with a rotamer library [12] and uses  
82 inverse kinematics to maintain backbone closure [9]. Finally, it selects a set of one to four

83 conformations for each residue that, collectively, optimally explain the local electron density in real  
84 space.

85

86 However, the anisotropy of the C $\beta$  atom limits the exploration radius of qFit to model backbone  
87 conformational heterogeneity. While protein backbone motions are often associated with large-  
88 amplitude conformational flexibility of surface loop regions, subtle motions can have important ripple  
89 effects in closely packed areas via sidechain-backbone coupling. For example, fast (ps-ns) backbone  
90 NH and sidechain methyl order parameters from spin relaxation experiments are highly correlated with  
91 each other in flexible regions [13], suggesting that mainchain and sidechain motions collectively sample  
92 conformational substates. For example, a backbone backrub motion [14] repositions the C $\alpha$ -C $\beta$  bond  
93 vector in a plane perpendicular to the chain direction, enabling the sidechain to access alternative,  
94 often sparsely populated rotamers that otherwise would be energetically unfavorable. We previously  
95 linked coupled transitions between alternative sidechain conformations, like “falling dominos”, to  
96 enzymatic turnover and allostery [15, 16].

97

98 Additionally, qFit cannot model discrete conformational substates such as peptide flips, which are  $>90^\circ$   
99 rotations of a peptide group while minimally perturbing the flanking residues. Some structure validation  
100 methods highlight incorrect peptide orientations [17] and even automate subsequent model rebuilding  
101 [18]. However, rebuilding fits a correct, unique conformation rather than multiple well-populated  
102 alternative peptide conformations. Peptide flips can have important functional roles in proteins. For  
103 example, flavodoxin undergoes peptide rotations between functional states as part of the catalytic cycle  
104 [19], and peptide flips that convert  $\beta$ -sheet to  $\alpha$ -sheet have been linked to amyloid formation [20].  
105 Furthermore, high-resolution crystal structures have shown that alternative conformations related by a  
106 peptide flip may be populated in the same crystal [14].

107

108 Modeling alternative conformations of glycine residues, which lack a C $\beta$  atom, is also a current  
109 limitation of qFit. The lack of a C $\beta$  atom allows glycine residues to access otherwise forbidden regions  
110 of conformational space [11] and thereby fill special structural roles such as capping helix C-termini  
111 [21]. In addition, the flexibility of glycines may contribute directly to function at flexible inter-domain  
112 linkers or conformationally dynamic enzyme active sites [22]. Automatically modeling such cases as  
113 alternative conformations with qFit paves the way toward understanding their contributions to protein  
114 function. Increasingly, new experiments are being proposed which, combined with computational  
115 analysis, can extract the spatiotemporal ensemble from electron density maps [15, 23, 24].

116

117 Adding the capability to model peptide flips and alternative conformations for glycines will increase our  
118 power to uncover conformational heterogeneity. While the number of sampled conformations for

119 glycines is modest owing to a missing side-chain, including peptide flips for all amino acids adds  
120 significant computational complexity to the qFit algorithm. A powerful quadratic programming algorithm  
121 lies at the core of qFit and is necessary to determine non-zero occupancies for up to four conformations  
122 from among hundreds or even thousands of candidate conformations for each residue. Even for  
123 modest sample sizes, around 500, the number of combinations of candidate conformations is  
124 enormous, exceeding  $10^9$ . As more backbone motion is incorporated into qFit, the computational  
125 complexity increases, demanding a parallelized approach to refinement on a residue by residue basis.  
126 Although this moves rebuilding away from a single node towards a larger compute cluster, the  
127 combination of data-driven sampling and selection has enabled qFit to automatically build  
128 multiconformer models that have illuminated intramolecular networks of coupled conformational  
129 substates [16] and the effects of cryocooling crystals [25, 26]. Similar hybrid approaches using robotics  
130 sampling and selection based on experimental NMR data are also being extended to nucleotide  
131 systems such as the excited state of HIV-1 TAR RNA [27].

132

133 Here we introduce qFit 2.0, an updated version of the qFit algorithm with new capabilities for modeling  
134 near-native backbone conformational heterogeneity in crystal structures. We first describe the  
135 quadratic programming procedure that allows selection of a small set of conformations per residue that  
136 collectively account for the local electron density, and discuss its extension to fitting backbone atoms in  
137 addition to sidechain atoms. We then describe new conformational sampling features of qFit 2.0, in  
138 particular glycine shifts and peptide flips. Finally, we validate the updated algorithm with both synthetic  
139 and experimental X-ray data. qFit 2.0 is freely available by webserver and source code is available for  
140 download at <https://simtk.org/home/qfit>.

141

## 142 **Results**

### 143 Improved backbone sampling and selection in qFit

144 To automatically identify alternative backbone conformations, including peptide flips, we augmented the  
145 sample-and-select protocol in qFit (see **Figure 1** and Methods). Previously, conformations were  
146 sampled based on anisotropy of the C $\beta$  atom and were selected based on the fit between observed  
147 and calculated electron density for the sidechain (C $\beta$  atom and beyond) only. Alternative  
148 conformations for mainchain atoms were ultimately included in the multiconformer model only because  
149 they accommodated the best sidechain fits. In qFit 2.0, we now select conformations based on the fit  
150 between observed and calculated electron density for the sidechain atoms and also the backbone O  
151 atom. The O atom is an excellent yardstick for identifying backbone conformational heterogeneity for  
152 two reasons. First, it is furthest from the C $\alpha$ -C $\alpha$  axis so its density profile is somewhat isolated and is  
153 displaced most by rotations around that axis [14]. Second, it has more electrons than other backbone  
154 heavy atoms, so is most evident in electron density maps. This change allows us to select peptide flips

155 outside of  $\alpha$ -helices and  $\beta$ -sheets, where flips are prevented by steric and hydrogen-bonding  
156 constraints, then directly select flipped conformations. This procedure is effective because the large  
157 movement of the backbone O during a peptide flip leaves a major signature in the electron density.

158

#### 159 Glycine modeling

160 Incorporating the backbone O atom also enhances the detection of less discrete backbone  
161 conformational changes. In particular, we now sample alternative glycine conformations based on  
162 anisotropy of the electron density for the O atom, by analogy to the  $C\beta$ -driven sampling for all other  
163 amino acids. This results in alternative glycine conformations that are dictated by their own local  
164 electron density. After sampling, we select combinations of conformers from a pool of candidates  
165 based on both sidechain and backbone O atoms for all amino acids, including glycines. This addition  
166 results in greater potential to discover alternative conformations throughout the protein and include  
167 additional conformational heterogeneity in the final multiconformer model.

168

#### 169 Characterizing peptide flip geometry

170 The nullspace inverse kinematics procedure of qFit [9] naturally encodes backrub [14], crankshaft [28],  
171 and shear [29, 30] motions (**Figure S1**) where they are dictated by the anisotropy of the electron  
172 density for the  $C\beta$  atom. However, this anisotropy cannot identify more discrete substates of the  
173 backbone, such as peptide flips. Peptide flips are large,  $\sim 180^\circ$  rotations of a peptide plane in protein  
174 backbone with minimal disturbance of adjacent peptide conformations. Enumerating many peptide flip  
175 candidate conformations with the nullspace inverse kinematics procedure would quickly lead to  
176 prohibitively large sample sizes. We therefore examined common geometries of discrete peptide flips to  
177 expedite sampling of discrete backbone substates in qFit 2.0.

178

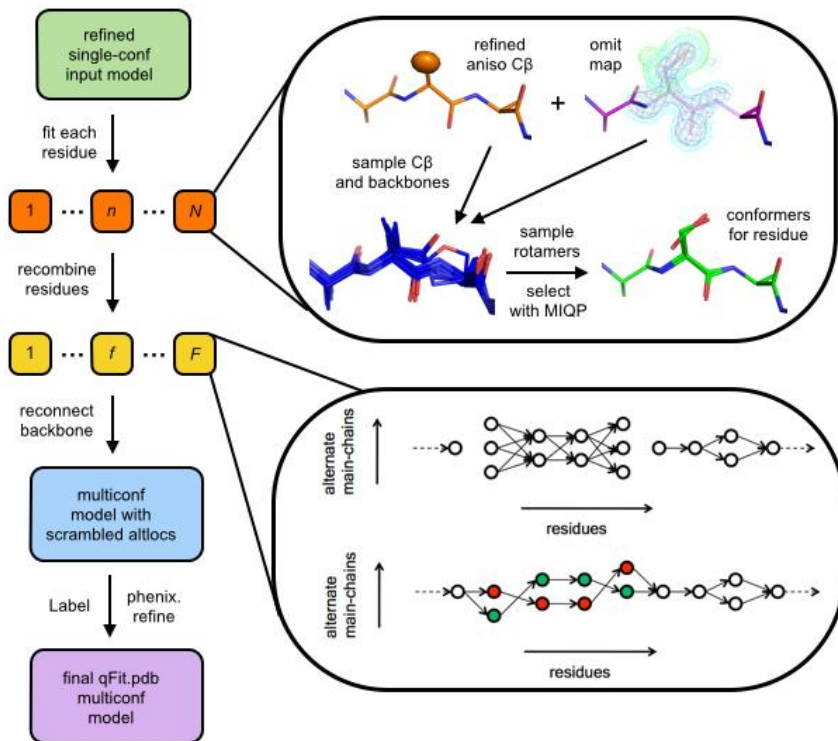

179

180 **Figure 1: Flowchart of the qFit 2.0 algorithm.** qFit can operate on each residue in the protein (orange boxes) in  
 181 parallel ( $1 \leq n \leq N$  indices are for residues in the protein). Anisotropic refinement gives a thermal ellipsoid for the  
 182 C $\beta$  (orange model), and refinement with occupancies set to 0 gives an omit map (purple model). These inputs  
 183 are combined, backbone translations and peptide flips are sampled (blue models), each backbone is decorated  
 184 with sidechain rotamers, and an MIQP is used to select 1-4 conformations for the residue. Residues with  
 185 consecutive multiple backbone conformations, called fragments (yellow boxes), are then subjected to a second  
 186 MIQP to trace compatible alternative backbone conformations across residues. Residues and fragments are  
 187 combined into an intermediate model. Finally, a Monte Carlo procedure is used to adjust alternative conformation  
 188 labels (“altloc” identifiers) to minimize steric overlaps, and the final model is refined.

189

190 Steric interactions prevent arbitrary rotations of the peptide plane, much like sidechains adopt preferred  
 191 rotamer conformations. To identify plausible geometries for peptides relative to a single input peptide,  
 192 we examined cases where the peptide rotates by 90-180° around the C $\alpha$ -C $\alpha$  axis. We identified 147  
 193 peptide flips modeled as alternative conformations in high-quality structures. After filtering this set of  
 194 peptide flips with structure validation criteria and reserving some examples for a test set, we retained  
 195 79 examples that clustered around four geometries (**Table S1**). We observed that peptide flips often  
 196 included rotation and translation within the peptide plane such that the first C $\alpha$  moves “below” the C $\alpha$ -  
 197 C $\alpha$  axis and the second C $\alpha$  moves “above” it (from the view in **Figure 2A,C**). These in-plane  
 198 movements justify sampling geometries found in natural peptide flips in qFit 2.0 rather than, e.g., simply  
 199 rotating the peptide 180° around the C $\alpha$ -C $\alpha$  axis. The first two clusters, “simple down” (**Figure 2A,C**,  
 200 blue) and “tweaked down” (**Figure 2A,C**, red), feature a very nearly 180° rotation around the C $\alpha$ -C $\alpha$

201 axis, but with different in-plane adjustments. By contrast, the second two clusters, “left” (**Figure 2B,D**,  
202 green) and “right” (**Figure 2B,D**, brown), feature rotations closer to 120°, but in opposite directions.  
203 Our dataset here is sufficient to propose plausible, well-validated peptide flip geometries for sampling in  
204 qFit 2.0, and suggests that the four clusters could also be used to inspire moves in protein design.  
205

| Cluster              | # of examples | # (%) in tight turn | # (%) with Gly as first residue | # (%) with Gly as second residue |
|----------------------|---------------|---------------------|---------------------------------|----------------------------------|
| “tweaked down” (red) | 26            | 13 (50%)            | 0 (0%)                          | 16 (62%)                         |
| “simple down” (blue) | 29            | 12 (41%)            | 4 (14%)                         | 19 (66%)                         |
| “left” (green)       | 10            | 0 (0%)              | 1 (10%)                         | 2 (20%)                          |
| “right” (brown)      | 14            | 2 (14%)             | 1 (7%)                          | 3 (21%)                          |

206 **Table 1: Peptide flip geometries aggregate into distinct clusters.** Colors refer to **Figure 2**.

207

### 208 Structural context of flips

209 We found that the two “down” clusters were more common in tight turns between  $\beta$ -strands: 41-50% of  
210 flips in these clusters were found in turns, as compared to 0-14% for the other two flip clusters (with a  
211 conservative definition of a turn; see Methods) (**Table 1**). The flip is nearly always associated with a  
212 transition between Type I/I' and II/II' turns. The “left”/“right” clusters were dispersed among many  
213 irregular structural contexts, but not  $\alpha$ -helices or  $\beta$ -sheets. Across the four clusters, the first residue of  
214 the peptide was a glycine 7.5% of the time, in line with the general abundance of glycines in proteins  
215 (7-8%). However, the second residue of the peptide was a glycine significantly more frequently (50%,  $p$   
216  $< 10^{-22}$ ). This was true for the “left”/“right” clusters (21%,  $p < 0.05$ ) and especially the two “down”  
217 clusters (**Figure 2C**) (64%,  $p < 10^{-24}$ ). This may be in part because a glycine as the second residue of  
218 a peptide can lower the flip transition energy [31]. These results generally agree with reports of flip-like  
219 conformational differences between the same tight turn in separate homologous structures [32].  
220

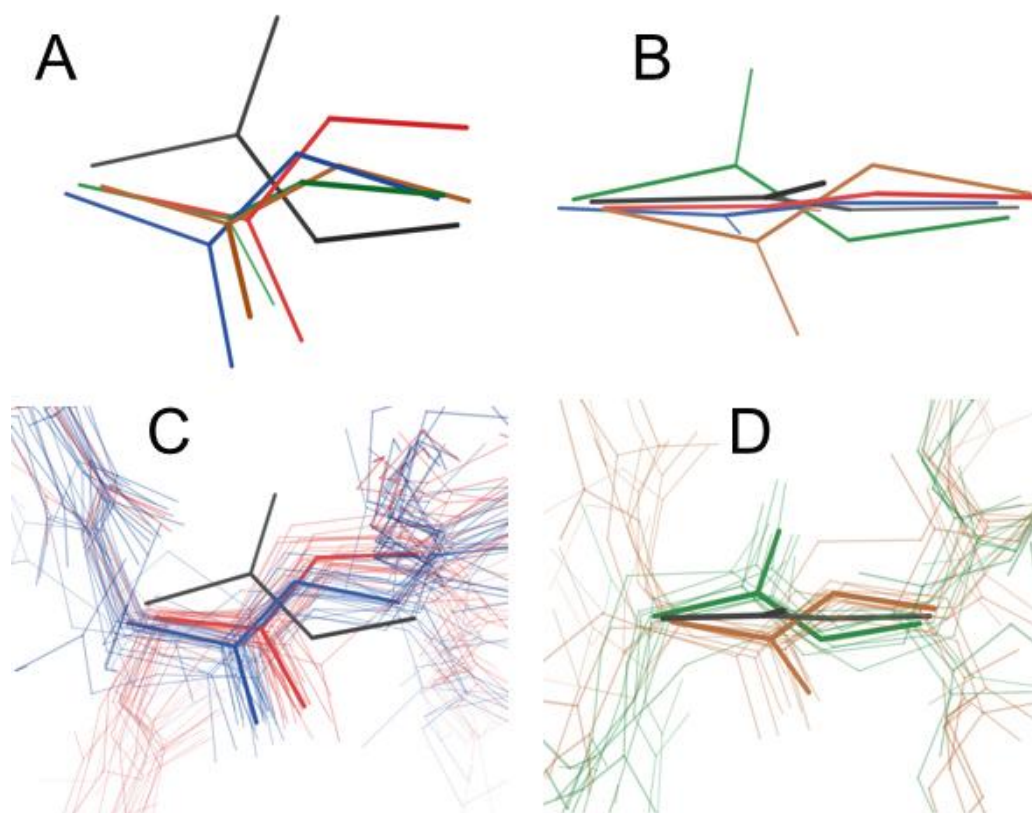

221

222 **Figure 2: Geometry and distribution of peptide flips in training set. (A,B)** Reference primary conformation  
223 peptide (black) and four cluster centroids for secondary peptide conformations (colors), from the side **(A)** or “top-  
224 down” **(B)**. **(C)** Members from the training set segregate into two  $\sim 180^\circ$  rotated clusters with different translations  
225 in the peptide plan (blue vs. red). View from roughly the same angle as **(A)**. **(D)** Other members from the training  
226 set segregate into  $+120^\circ$  and  $-120^\circ$  rotated clusters (green vs. brown). View from roughly the same angle as **(B)**.

227

228

### 229 Tests with synthetic datasets

230 To test these advances, we first explored synthetic datasets spanning resolutions from 0.9 to 2.0 Å with  
231 increasing B-factors as a function of resolution and Gaussian noise added to structure factors (see  
232 Methods). We used the Top8000 peptide flip geometry cluster centroids, with the alternative  
233 conformations at 70/30 occupancies for the “tweaked down” cluster and 50/50 occupancies for the  
234 other three clusters. Because qFit uses these geometries to sample peptide flips, we expected it would  
235 be able to successfully identify each flipped alternative conformation starting from the primary (labeled  
236 “A”) conformation at high-to-medium simulated resolution, but less well at lower simulated resolution.  
237 Indeed, qFit 2.0 successfully finds the flipped conformations for most peptide flip geometry clusters  
238 across resolutions with a 92% success rate overall; this rate drops only slightly with resolution from 0.9  
239 to 2.0 Å (**Figure 3**). Since we rebuilt the entire protein chain, we also assessed the performance on  
240 other residues. By contrast to the true positive peptide flip results, the peptide flip and rotamer false  
241 positive rates remain quite low across clusters and resolutions (**Figure 3**). These results indicate that



242 qFit 2.0 is effective at identifying peptide flip alternative conformations across a wide range of  
243 crystallographic resolutions without introducing spurious conformations.  
244

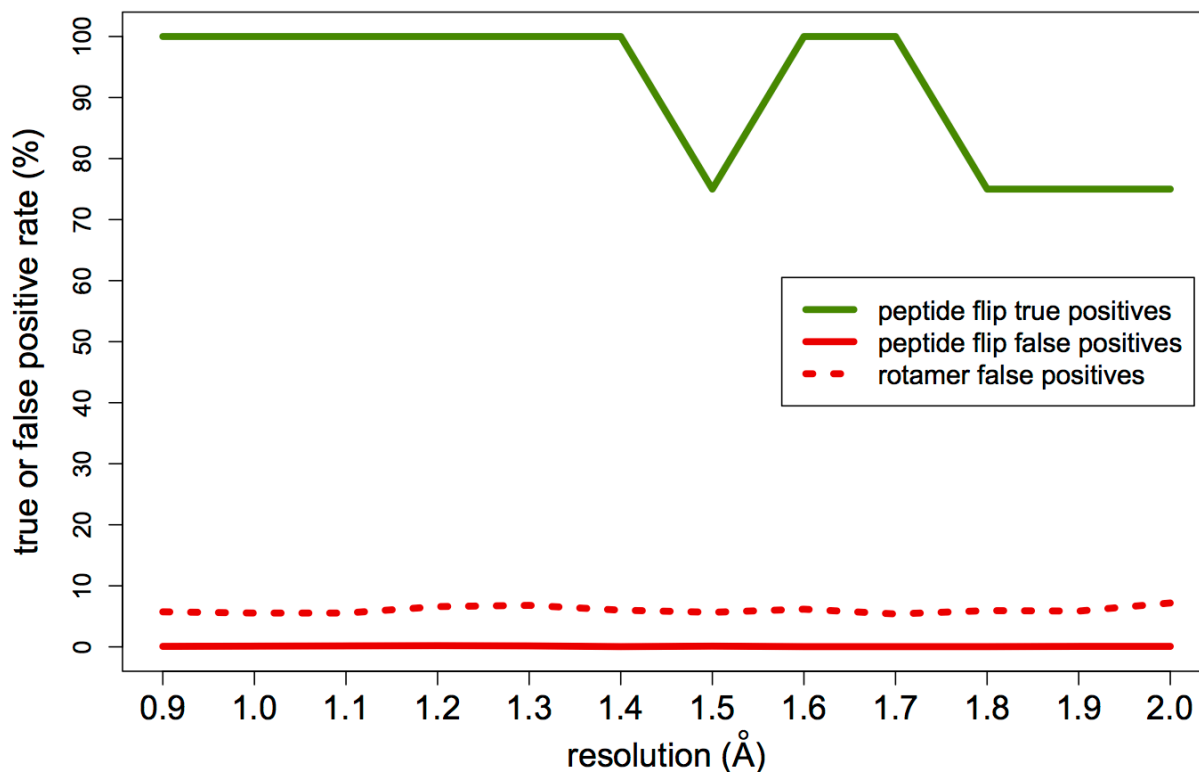

245  
246 **Figure 3: True vs. false positives with synthetic data.** Peptide flip true positives = percent of peptide flips in  
247 the actual synthetic model that are present in the qFit 2.0 model. Peptide flip false positives = percent of residues  
248 with a peptide flip in the qFit 2.0 model that are not in the actual synthetic model. Rotamer false positives =  
249 percent of sidechain rotamers (as defined by MolProbity [12, 33]) in the qFit 2.0 model that are not in the actual  
250 synthetic model. True positives in green; false positives in red. Peptide flips in solid lines; rotamers in dotted line.  
251 Data is averaged over all four synthetic datasets (corresponding to the four peptide flip geometry clusters in  
252 **Figure 2**) and all three mainchain amplitudes are considered; see Methods.

253

254

### 255 Tests with experimental datasets

256 Although tests with synthetic datasets offer insight into resolution dependence, a more direct test of the  
257 usefulness of qFit 2.0 involves crystal structures with real data. We combined structures left out of the  
258 training set from the Top8000 peptide flip examples with a few more manually curated examples for a  
259 total of 15 test cases (**Table 2**). When comparing qFit 2.0 models to rerefined original structures,  $R_{\text{free}}$   
260 is better for 7/15 cases and  $R_{\text{work}}$  is better for 8/15 cases (**Figure S2**). However, after rerefinement with  
261 automated removal and addition of water molecules to allow the ordered solvent to respond to the new  
262 protein alternative conformations modeled by qFit (see Methods),  $R_{\text{free}}$  is better for the qFit 2.0 model

263 for 10/15 cases and  $R_{\text{work}}$  is better for 13/15 cases (**Figure 4**). The differences generally are small: the  
264 average  $\Delta R_{\text{free}}$  is  $\sim 0.1\%$ . Overall, these results suggest that qFit 2.0 models explain experimental  
265 crystallographic data as well as or better than traditional refinement protocols at a global structural  
266 level.  
267

| PDB ID | Resolution (Å) | Chain | Peptide | Found flip? |
|--------|----------------|-------|---------|-------------|
| 1w0n   | 0.80           | A     | 42-43   | Y           |
| 1nki   | 0.95           | A     | 53-54   | Y           |
| 1nki   | 0.95           | B     | 53-54   | Y           |
| 1x9i   | 1.16           | A     | 65-66   | Y           |
| 1c9o   | 1.17           | A     | 36-37   | Y           |
| 1c9o   | 1.17           | B     | 36-37   | n           |
| 2c6z   | 1.20           | A     | 227-228 | n           |
| 2qd6   | 1.28           | A     | 50-51   | n           |
| 2qd6   | 1.28           | B     | 150-151 | Y           |
| 3n6z   | 1.30           | A     | 177-178 | Y           |
| 2c0c   | 1.45           | A     | 44-45   | n           |
| 3h0u   | 1.50           | C     | 115-116 | Y           |
| 3e15   | 1.60           | A     | 50-51   | Y           |
| 3e15   | 1.60           | B     | 50-51   | Y           |
| 3ii7   | 1.63           | A     | 539-540 | Y           |
| 3ie5   | 1.69           | A     | 61-62   | Y           |
| 2ozv   | 1.70           | A     | 54-55   | Y           |
| 3f7w   | 1.85           | A     | 48-49   | Y           |

268 **Table 2:** List of positive-control peptide flip test cases. Last column indicates whether or not qFit 2.0 found the  
269 peptide flip alternative conformations for at least one of the three backbone amplitude parameters. Overall, 14/18  
270 (78%) peptide flips were successfully identified.  
271

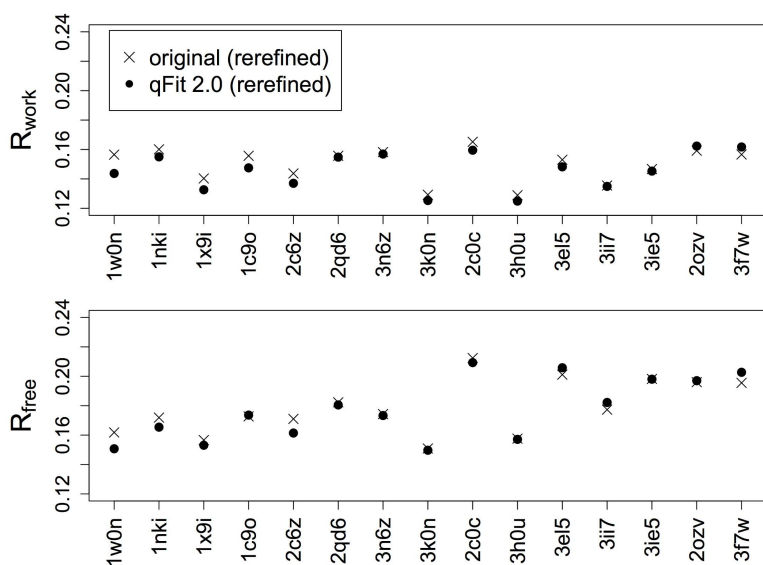

272

273 **Figure 4: Multiconformer modeling with qFit results in similar or better crystallographic R-factors.**  $R_{work}$   
274 and  $R_{free}$  are plotted vs. PDB ID sorted from high to low resolution. X's indicate rerefined original structures and  
275 filled circles indicate qFit 2.0 models; both are after refinement with water picking.

276

277 While global metrics are important, a major focus of the current work is correctly identifying local  
278 alternative backbone conformations. To explore this aspect, we compared results from qFit 2.0 to those  
279 from qFit 1.0 and original deposited structures for our test set (**Table 2**). qFit 2.0 successfully models  
280 both flipped conformations in 14/18 (78%) cases. For example, Val539-Gly540 in the Kelch domain of  
281 human KLHL7 is modeled with two alternative conformations related by a peptide flip (1.63 Å, PDB ID  
282 3ii7) (**Figure 5A**). qFit 1.0 fails to discover the flip, resulting in significant difference electron density  
283 peaks (**Figure 5B**). By contrast, qFit 2.0 beautifully recovers both alternative conformations (**Figure**  
284 **5C**). In another example, Asn42-Gly43 in carbohydrate binding domain 36 at high resolution (0.8 Å,  
285 PDB 1w0n) adopts flipped peptide conformations -- yet MolProbity flags geometry errors in the  
286 deposited structure that indicate it re-converges too quickly, with alternative conformations for only the  
287 Asn42 and not also Gly43 (**Figure 5D**). qFit 1.0 fails to capture the flip (**Figure 5E**). However, qFit 2.0  
288 not only identifies both peptide flip conformations for Asn42, but also includes split conformations for  
289 Gly43, thereby repairing the covalent backbone geometry (**Figure 5F**). In both cases, the peptide flip  
290 and glycine sampling enhancements in qFit 2.0 combine to model discrete backbone heterogeneity as  
291 accurately as or even better than the original structure.

292

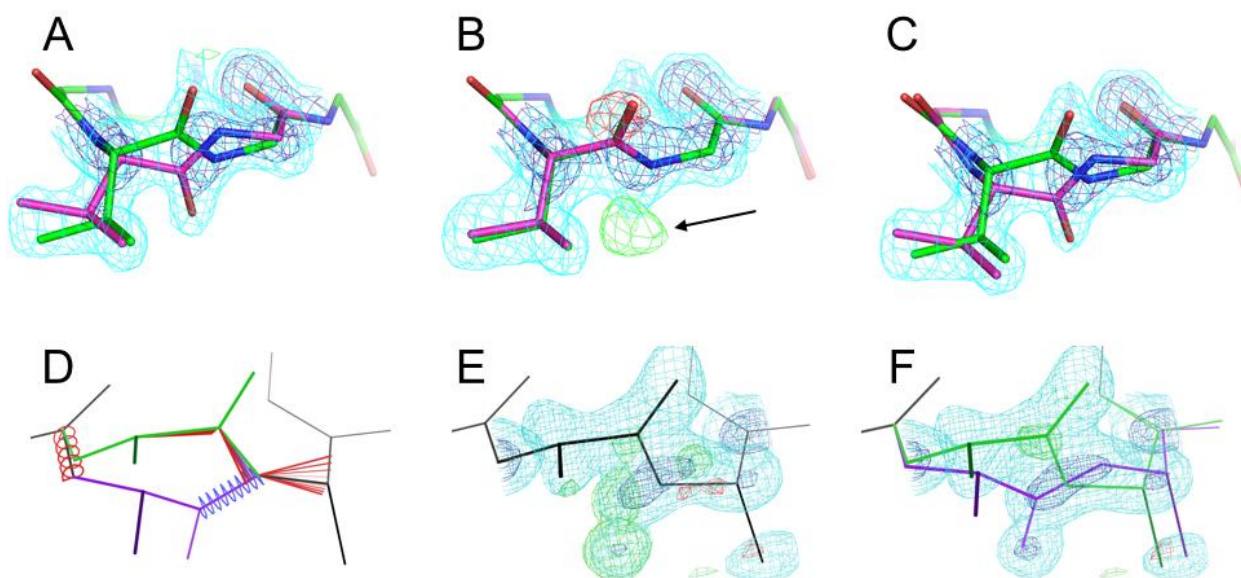

293

294

295

296

297

298

299

300

301

302

303

304

305

306

307

308

309

310

311

312

313

314

315

316

317

318

319

**Figure 5: qFit 2.0 successfully identifies known peptide flips.** (A-C) Val539-Gly540 in the Kelch domain of human KLHL7 at 1.63 Å (PDB ID 3ii7). 2mFo-DFc electron density is contoured at 1.2  $\sigma$  (cyan) and 2.5  $\sigma$  (blue); mFo-DFc electron density is contoured at +3.0  $\sigma$  (green) and -3.0  $\sigma$  (red). (A) The deposited model includes alternative conformations for this peptide, which are well justified by the electron density. (B) qFit 1.0 starting from single-conformer input fails to find the second conformation, resulting in peaks in the difference density map (arrow). (C) qFit 2.0 finds both conformations, resulting in the disappearance of the difference peaks. (D-E) Asn42-Gly43 in carbohydrate binding domain 36 at 0.8 Å resolution (PDB ID 1w0n). The Asn42 sidechain (left, darker green/purple) points up out of the image so is visually truncated. In (E-F), 2mFo-DFc electron density is contoured at 1.5  $\sigma$  (cyan) and 2.5  $\sigma$  (blue); mFo-DFc electron density is contoured at +3.0  $\sigma$  (green) and -3.0  $\sigma$  (red). (D) The deposited structure includes alternative conformations (green and purple) related by a peptide flip, but re-converges too early at the Gly43 backbone N atom, resulting in >4  $\sigma$  bond length (red and blue fans) and bond angle (red and blue springs) outliers [33]. (E) qFit 1.0 fails to identify the flip, leaving significant difference density map features. (F) qFit 2.0 identifies the flip at Asn43 and also correctly splits Gly43 into separate conformations, thereby flattening the difference map relative to qFit 1.0 and eliminating the covalent geometry errors in the original structure.

### Discovering new conformational heterogeneity from experimental datasets

In addition to retrospective positive-control tests, we also looked prospectively for “hidden” peptide flip alternative conformations that are unmodeled in existing structures. One such example is Met519-Thr520 in RNA binding protein 39. In chain A of the room-temperature structure (PDB ID 4j5o), the mFo-DFc difference electron density map around this peptide has significant positive and negative peaks, indicating it is mismodeled as a single conformation (Figure 6A). Other instances of this peptide -- including in chain B of the room-temperature structure and both chains of the cryogenic structure -- feature conformational diversity, much of which may be related to crystal contacts; however, these conformations fail to account for the room-temperature chain A mFo-DFc peaks (Figure 6B). However, using the room-temperature data, qFit 2.0 identifies a peptide flip in this region, which

320 repositions Met519 and flattens the local difference density (**Figure 6C**). By contrast, it does not  
321 identify a peptide flip for this region in either chain using the cryogenic data, which is in accord with  
322 previous reports that cryocooling crystals can conceal or otherwise perturb conformational  
323 heterogeneity that is present at room temperature [25, 26].

324

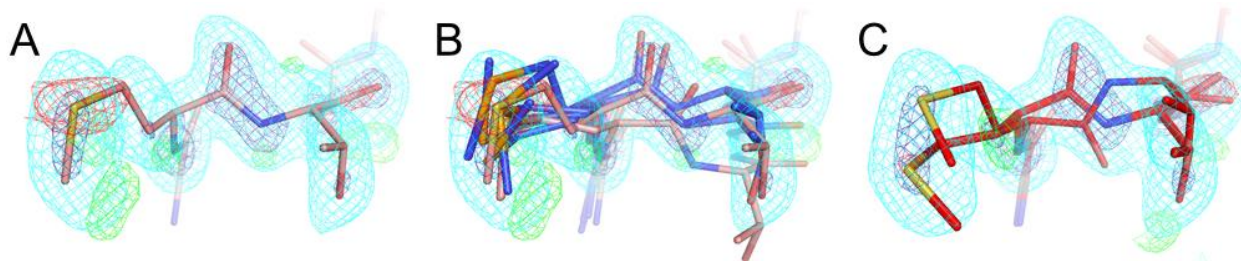

325

326 **Figure 6: qFit 2.0 finds a hidden peptide flip at room temperature.** (A) Met519-Thr520 in mouse RNA binding  
327 protein 39 (RBM39) is modeled with just a single conformation in chain A of the 1.11 Å room-temperature  
328 structure (PDB ID 4j5o, pink). There appear to be missing unmodeled conformations based on mFo-DFc difference  
329 electron density contoured at +3.0  $\sigma$  (green) and -3.0  $\sigma$  (red). 2mFo-DFc electron density is shown contoured at  
330 0.9  $\sigma$  (cyan) and 2.5  $\sigma$  (dark blue). (B) Although there is diversity for this region in chain B of the asymmetric unit  
331 from this structure and in chains A and B from the 0.95 Å cryogenic structure (PDB ID 3s6e, blue), none of the  
332 other instances explain the electron density at RT in chain A. There is also no clear evidence for missing  
333 alternative conformations in these other instances (not shown). (C) The RT qFit model (magenta) adds a flipped  
334 peptide as an alternative conformation, which positions the Met519 sidechain differently. Collectively, these  
335 changes better explain the local electron density.

336

337 In addition to selection of conformers based on fit to density for the backbone O atom for all amino  
338 acids, qFit 2.0 also adds sampling based on this atom for glycine, enabling density-driven backbone  
339 sampling for the most flexible amino acid. This facilitates modeling peptide flips in which one of the  
340 constituent residues is a glycine, as seen in the examples above (**Figure 5**) -- but also opens the door  
341 to modeling less discrete glycine flexibility. For the 489 glycines across the 15 datasets in the test set  
342 (**Table 2**), qFit 1.0 cannot model more than a single conformation, but qFit 2.0 models alternative  
343 conformations for 365/489 (75%) of glycines. The C $\alpha$  displacements average 0.28 Å and range from  
344 <0.01 Å up to 1.70 Å. Only 4 (4%) of these glycines were modeled with alternative conformations in the  
345 original PDB structures. These results show that the direct sampling and selection based on electron  
346 density for glycine backbone atoms in qFit 2.0 successfully identify conformational heterogeneity that  
347 was formerly unrecognized. For example, a small, glycine-rich loop in PDB ID 3ie5 is modeled with a  
348 single conformation in the deposited structure and qFit 1.0 model (**Figure 7A**). By contrast, qFit 2.0  
349 recognizes the anisotropy of the electron density for each of the three glycine O atoms in the loop, so  
350 models them with alternative conformations that collectively shift the entire mini-loop region (**Figure**  
351 **7B**).

352

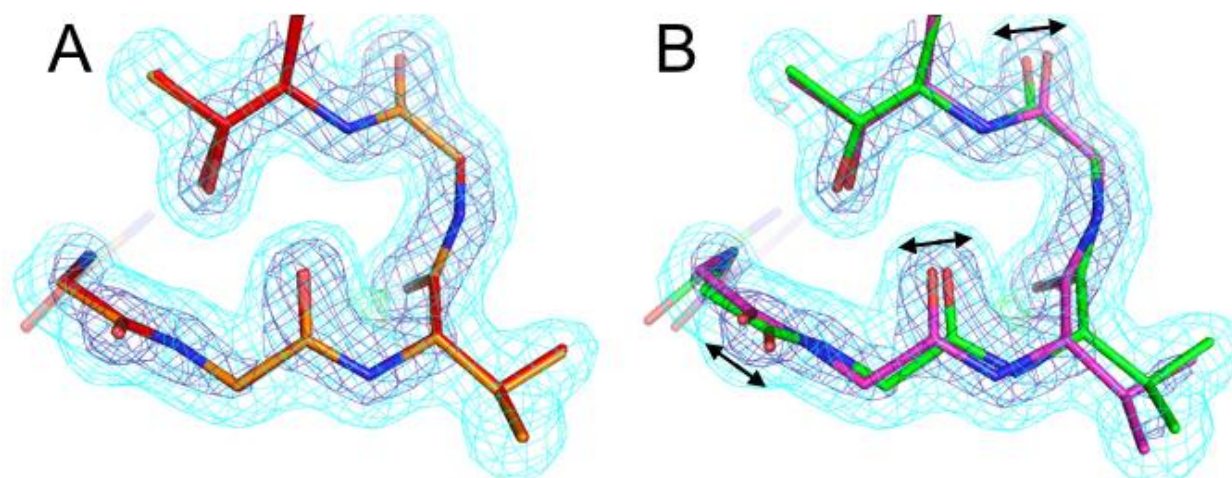

353

354 **Figure 7: qFit 2.0 identifies alternative glycine conformations.** This small loop in the 1.69 Å structure of Hyp-  
355 1 protein from St. John's wort (PDB ID 3ie5) includes several glycines: 49, 50, and 52. **(A)** The deposited  
356 structure (orange) depicts these glycines with single conformations. The qFit 1.0 model (red) does the same,  
357 because it cannot sample alternative glycine conformations. **(B)** The qFit 2.0 model identifies alternative  
358 conformations (green/purple) for the entire loop, including all three glycines, based on subtly anisotropic  
359 backbone O atoms (arrows). 2mFo-DFc electron density contoured at 1.0  $\sigma$  (cyan) and 3.0  $\sigma$  (blue); mFo-DFc  
360 electron density contoured at +3.0  $\sigma$  (green) and -3.0  $\sigma$  (red).

361

362 Selecting conformers based on fit to density for the backbone O atom helps find alternative  
363 conformations not only for glycines, but also more generally for other amino acids. In many cases, this  
364 additional data-driven aspect to conformer selection drives the identification of subtle, non-discrete  
365 backbone motions that are coupled to larger, discrete sidechain changes. Indeed, for the 15 proteins in  
366 **Table 2**, qFit 2.0 shifts the C $\alpha$  more than does qFit 1.0 for 52% of residues, but the reverse is true for  
367 only 20% of residues (the remaining residues are not moved by either version) (**Figure 8A**).  
368 Furthermore, for 63% of the residues for which qFit 2.0 finds a new sidechain rotamer that qFit 1.0 does  
369 not, qFit 2.0 also moves the C $\alpha$  more (**Figure 8B**). These results imply that the backbone sampling by  
370 qFit 2.0 not only increases backbone heterogeneity in and of itself, but also drives discovery of  
371 sidechain conformational heterogeneity. As one specific example, Thr157 in cyclophilin A is modeled  
372 with alternative backbone and rotamer conformations in the deposited structure (**Figure 8A**). qFit 1.0  
373 fails to find the alternative rotamer because it maintains a single backbone conformation (**Figure 8B**),  
374 but, driven by carbonyl O anisotropy, qFit 2.0 identifies the alternative backbone conformations,  
375 allowing it to discover the second rotamer (**Figure 8C**).

376

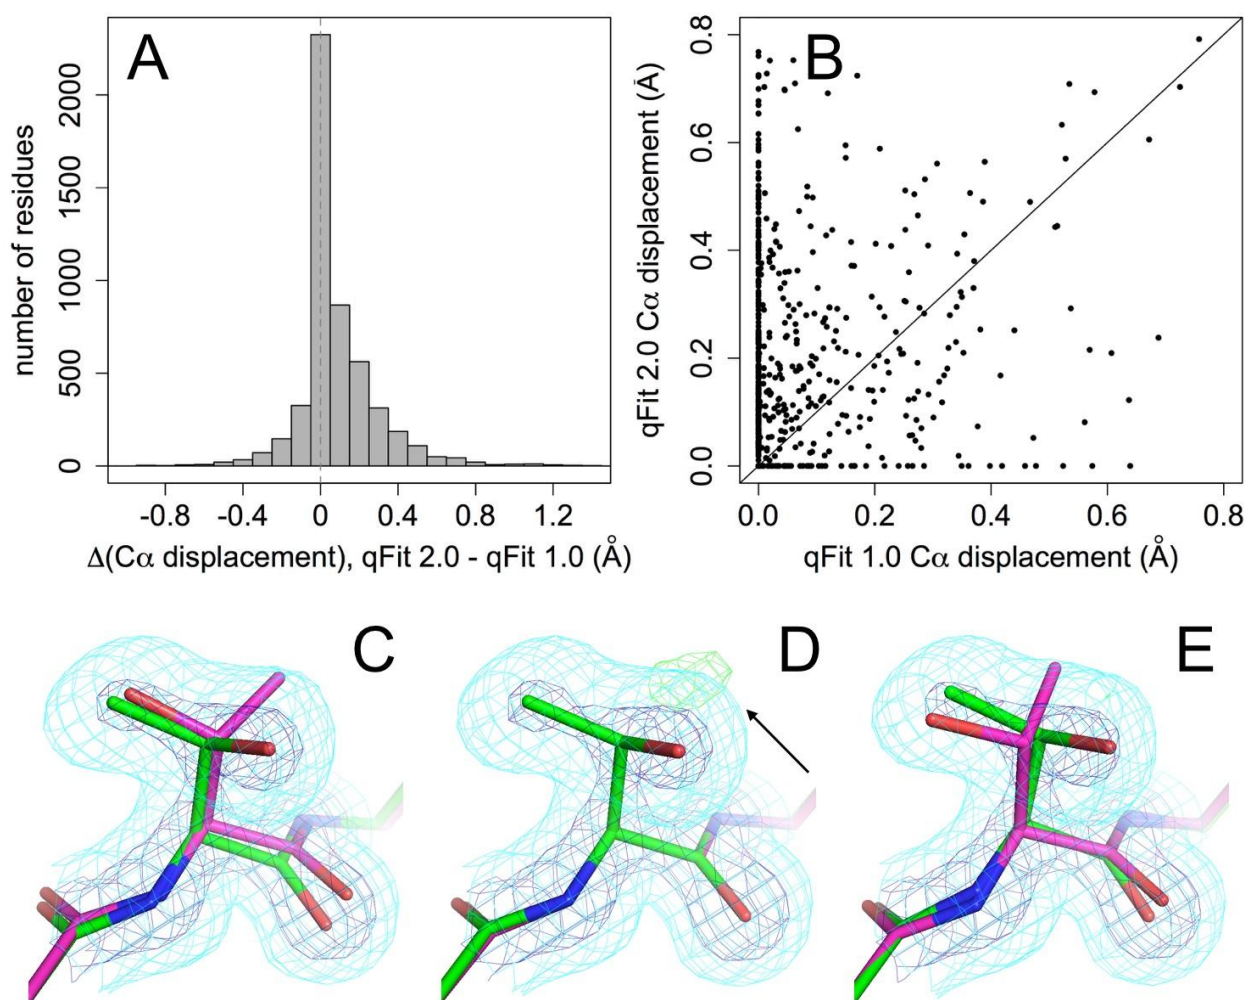

377

378 **Figure 8: Extra backbone heterogeneity in qFit 2.0 helps discover new sidechain heterogeneity.**

379 **(A)** Histogram of difference in maximum C $\alpha$  displacement across all combinations of alternative conformations  
380 between qFit 2.0 and qFit 1.0 for the test set. Vertical dotted line at 0 difference. **(B)** Maximum C $\alpha$  displacements  
381 for qFit 2.0 vs. 1.0 for residues with a newly discovered sidechain rotamer in the qFit 2.0 model but not in the qFit  
382 1.0 model. Many of these residues fall above the diagonal line, meaning the C $\alpha$  moves more in the qFit 2.0  
383 model than in the qFit 1.0 model. **(C-D)** Thr157 in cyclophilin A at room temperature (PDB ID 3k0n). 2mFo-DFc  
384 electron density is contoured at 0.5  $\sigma$  (cyan) and 3.0  $\sigma$  (blue); mFo-DFc difference electron density is contoured at  
385 +3.1  $\sigma$  (green) and -3.1  $\sigma$  (red). **(C)** The deposited structure has alternative rotamers that were correctly manually  
386 modeled. **(D)** qFit 1.0 does not move the backbone and misses the alternative rotamer, as evidenced by a peak  
387 of +mFo-DFc density (arrow). **(E)** qFit 2.0 does move the backbone (note especially the backbone carbonyl  
388 displacement), and successfully identifies the alternative rotamer.

389

390 Newly identified peptide flips in the “flap” region of HIV protease

391 We also observed hidden peptide flips for the Ile50-Gly51 tight turn in the “flap” region of HIV-1  
392 protease. HIV-1 protease is a homodimer, with residue numbers often denoted by 1-99 and 1'-99'. The  
393 flap region consisting of residues 46-56 is an antiparallel  $\beta$ -sheet and tight turn at the interface of the  
394 dimer (**Figure 9A**). In most of the hundreds of crystal structures of HIV-1 protease, the two tight turns

395 (Leu50-Gly51 and Leu50'-Gly51') adopt an asymmetric conformation, with one flap in a single type I  
396 conformation and the other in a single type II conformation. However, NMR relaxation data suggest  
397 that these flips can undergo chemical exchange on a slow ( $\sim 10 \mu\text{s}$ ) timescale in solution [34].  
398 Mutational data also linked collective conformational exchanges of these flips to catalytic rates [35]. In  
399 line with these solution studies, we noticed that for many HIV-1 protease crystal structures, the electron  
400 density maps actually reveal strong evidence for alternative conformations related by dual peptide flips.  
401 For example, in one high-resolution inhibitor-bound structure (PDB ID 3qih), the Leu50-Gly51 and  
402 Leu50'-Gly51' flaps are modeled with single asymmetric conformations, but strong positive mFo-DFc  
403 electron density coincides with potentially flipped states (**Figure 9B**). Strikingly, qFit 2.0 automatically  
404 identifies dual "flap flips", suggesting the flaps actually populate two different asymmetric states (green  
405 vs. purple in **Figure 9C**) in this particular inhibitor complex. More generally, this result suggests that  
406 these inhibitor-gating flaps in HIV-1 protease sample multiple conformations more often than previously  
407 recognized across many inhibitor complexes, which may motivate further investigation of the effects  
408 that protein and inhibitor flexibility have on binding affinity, efficiency of catalytic inhibition, and arisal of  
409 drug resistance in this biomedically important target.  
410

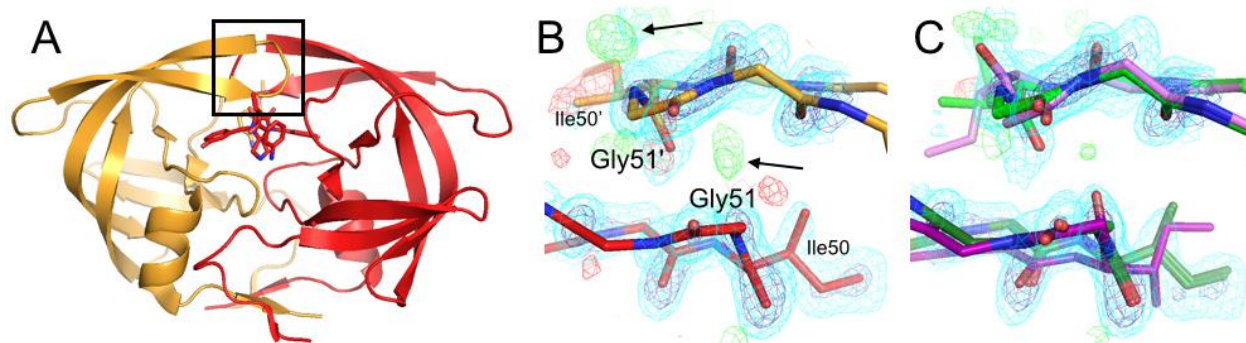

411  
412 **Figure 9: Hidden unmodeled peptide flips in the inhibitor-gating "flaps" of HIV-1 protease.** (A) In the 1.39  
413 Å structure of a mutant of HIV-1 protease bound to a novel inhibitor (PDB ID 3qih), the Ile50-Gly51 tight turn  
414 interacts with the dimer-related copy of itself, Ile50'-Gly51' (boxed region). Chain A in orange, chain B in red. The  
415 inhibitor (sticks) binds in two overlapping poses immediately adjacent to these flaps. (B) This dimer interface,  
416 viewed as if from above in (A), is asymmetric in the deposited structure: both copies of the peptide point  
417 downwards in this view. However, positive difference electron density (arrows) suggest unmodeled  
418 conformations. (C) qFit 2.0 models this region with coupled asymmetric peptide flips, such that both copies of the  
419 peptide point down ( $\sim 70\%$ , green) or both point up ( $\sim 30\%$ , purple) in this view. The multiconformer model has  
420 diminished difference electron density peaks, suggesting it is a better local fit to the data. Residual difference  
421 peaks may reflect unmodeled partial-occupancy waters that are mutually exclusive with the new protein  
422 alternative conformations. 2mFo-DFc contoured at 1.2  $\sigma$  (cyan) and 3.0  $\sigma$  (blue); mFo-DFc contoured at +3.0  $\sigma$   
423 (green) and -3.0  $\sigma$  (red).  
424  
425



## 426 Discussion

427 The ruggedness of protein energy landscapes leads to conformational heterogeneity even in folded  
428 globular proteins. Evidence for these alternative conformations is remarkably prevalent in high-  
429 resolution (<2 Å) crystallographic electron density maps [6]. However, because these alternative  
430 conformations are difficult and/or time-consuming to model manually using existing graphics and  
431 refinement tools, they are underrepresented in the PDB [6]. qFit is a computational approach to  
432 overcoming these problems, by automatically identifying “hidden” alternative conformations and using  
433 quadratic programming to select a parsimonious subset that collectively best explains the diffraction  
434 data. Here we have demonstrated a new version of this algorithm, called qFit 2.0, with several  
435 enhancements to handling flexible backbone -- most notably, automated detection of discrete peptide  
436 flips and explicit fitting of backbone atoms for glycines.

437

438 qFit has previously captured different types of backbone motion that can occur in secondary structure.  
439 For example, it correctly identifies the backrub motion [14] that helps Ser99 transition between  
440 sidechain rotamers in the active-site  $\beta$ -sheet network of CypA [15, 16], and also identifies a previously  
441 hidden  $\alpha$ -helix winding/unwinding or “shear” motion [14, 29] (**Figure S1**). However, qFit 2.0 can now  
442 model larger backbone motions in which the backbone change itself is discrete, instead of inherently  
443 continuous but coupled to discrete sidechain rotamer changes. Specifically, it models peptide flips,  
444 which occur outside of helices and sheets and involve discrete jumps over a larger energetic barrier.

445

446 Peptide flips have important implications for understanding protein function. For example, our results for  
447 HIV-1 protease (**Figure 9**) strongly suggest that conformational heterogeneity, in particular peptide  
448 flips, may play underappreciated roles in protein-inhibitor complexes. Previously, molecular dynamics  
449 simulations identified a large-scale “curling” motion of these flaps that is maintained by drug-resistance  
450 mutations and therefore seems important for substrate access [36]. Although this motion is more  
451 dramatic than the peptide flaps at the tips of the flaps that we observe, it underlines that flap flexibility --  
452 potentially across multiple length scales -- is central to protease function and viral propagation. The  
453 peptide flip acts as a key conformational switch between type I/II turns, rearranging its environment  
454 beyond its immediate sequence neighbors and enabling alternative sidechain conformations with  
455 implications for function. However, the large number of unmodeled turns in HIV protease structures  
456 illustrates the challenge of distinguishing alternative conformations in electron density maps, even at  
457 high resolution. As an additional example which unfortunately lacks deposited structure factors, the  
458 active-site Gly57-Asp58 peptide in *C. beijerinckii* flavodoxin adopts distinct peptide flip states in concert  
459 with the oxidation state of the FMN prosthetic group [19]. The N137A mutation removes artificial lattice  
460 contacts that otherwise influence the conformation of the Gly57-Asp58 peptide, which results in a

461 mixture of these peptide conformations simultaneously populated in the crystal; this suggests these  
462 multiple flip states may also coexist in solution [19].

463

464 Beyond the specific improvements to peptide flips, qFit 2.0 now fits conformations for each residue  
465 based on both sidechain (beyond C $\beta$ ) and backbone (carbonyl O) atoms. Although we originally  
466 envisioned this change for modeling glycines, we observed that it results in dramatically more extensive  
467 backbone conformational heterogeneity across the protein (**Figure 8**). R-factors are similar or better  
468 (**Figure 4**), suggesting the new models with more heterogeneity are at least as good an explanation of  
469 the experimental data. Notably, these new backbone shifts drive discovery of many more alternative  
470 sidechain rotamers (**Figure 8**). Our results suggest that sidechain and backbone degrees of freedom in  
471 proteins are tightly coupled, in agreement with previous reports that even subtle backbone motions can  
472 facilitate rotamer changes [14], open up breathing room for natural mutations [37], and expand  
473 accessible sequence space in computational protein design [30, 38].

474

475 Future work will investigate an armamentarium of methods for modeling larger backbone  
476 conformational change in qFit, including helix shear motions [29], adjustments of entire  $\alpha$ -helices [39,  
477 40], correlated  $\beta$ -sheet flexing [28], automated loop building algorithms such as Xpleo [9], and pre-  
478 knowledge of conformational differences between homologous structures. While these future steps will  
479 move us closer to capturing the full hierarchy of protein conformational substates [41], they will also  
480 dramatically increase the computational cost of automated multiconformer model building. Many  
481 aspects of qFit are parallelizable; however, the total computational cost for reproducing the data in this  
482 manuscript is approximately  $10^5$  CPU hours. As cloud-computing capabilities of  $10^8$  CPU hours can  
483 now be leveraged for pure simulation data [42], we envision that marshalling similar computational  
484 capabilities will become increasingly important for analysis of experimental X-ray data. Such data-  
485 driven computational approaches to studying the dynamic relationship between protein structure and  
486 function will be especially powerful when applied to series of datasets in which the protein is subjected  
487 to perturbations that modulate conformational distributions, such as ligand binding or temperature  
488 change [23].

489

## 490 **Materials and Methods**

491

### 492 Learning peptide flip geometries

493

494 To define possible relative geometries between flipped peptide conformations, we searched for  
495 trustworthy peptide flips modeled as alternative conformations in the Top8000 database. This database  
496 contains ~8000 (7957) quality-filtered protein chains from high-resolution crystal structures, each with  
497 resolution < 2 Å, MolProbity score [33] < 2, nearly ideal covalent geometry, and <70% sequence  
498 identity to any other chain in the database [43 ISBN: 978-981-4449-15-1]. We searched the Top8000

499 for peptides with carbonyl C-O bonds pointed away from each other (O-O distance > C-C distance + 1  
500 Å) and rotated by at least 90°, and for which both flanking C $\alpha$  atoms reconverged to < 1.5 Å. Although  
501 peptide rotations of < 90° also occur, they occur more often in irregular loop regions, have less well-  
502 converged backbone for flanking residues, and are generally more diverse and difficult to simply  
503 categorize. By contrast, in this study we investigate the class of localized peptide rotations with well-  
504 converged backbone for both flanking residues. These are either very small rotations, or large flips with  
505 a rotation nearer to 180° -- the latter being the focus here. To identify test cases for qFit 2.0, we  
506 curated the resulting dataset by removing examples with more than two alternative peptide  
507 conformations; a *cis* rather than *trans* conformation for either state; or obvious errors based on steric  
508 clashes, strained covalent geometry, or torsional outliers from MolProbity [33]. This resulted in 104  
509 examples, from which we kept a randomly selected 79 for a geometry training set (**Table S1**). We  
510 combined a subset of the remaining 25 peptide flips with a few other known examples for a test set of  
511 18 examples (**Table 1**). The resolution range is 0.92-1.95 Å for the training set and 0.80-1.85 Å for the  
512 test set.

513

514 Next we characterized the geometry of peptide flips by clustering the coordinates of the flipped  
515 alternative conformation (labeled “B”) in the training set after superimposing onto a reference peptide.  
516 We used the k-means algorithm with RMSD between the five heavy atoms of the peptide backbone  
517 (C $\alpha$ 1, C1, O1, N2, and C $\alpha$ 2) for different values of k. We selected k = 4 because we observed cluster  
518 centroids with approximately 180°, +120°, and -120° rotations and for k > 4 no other significantly  
519 different rotations were identified. Notably, all four cluster centroids featured translations of the flanking  
520 C $\alpha$  atoms of >0.2 Å, and as much as >0.9 Å for one cluster (“tweaked down”, red in **Figure 2**). The  
521 transformation matrices relating the flipped peptide cluster centroids to the reference peptide were used  
522 in qFit 2.0 to sample plausible alternative conformations, with subsequent refinement adjusting the  
523 atomic positions away from the centroid geometry.

524

### 525 Tight turns and glycine enrichment

526

527 We defined tight turns as having a mainchain-mainchain hydrogen bond between *i*-1 carbonyl C=O and  
528 *i*+2 amide N-H that was detectable by the program Probe [44]. This definition is somewhat  
529 conservative; several more examples also were visually similar to tight turns. Enrichment of glycines at  
530 the two positions involved in a peptide flip was assessed for different peptide flip clusters within the  
531 training set relative to a large set of 337 randomly selected structures containing 6,092 total glycines  
532 out of 78,094 total amino acid residues. The statistical significance of this enrichment was assessed  
533 using a one-tailed Fisher’s exact test based on the hypergeometric distribution [45].

534

### 535 qFit

536

#### 537 *qFit part 1: Preparing each residue for qFit*

538

539 qFit exhaustively examines a vast number of interpretations of local electron density, and  
540 deterministically selects a small ensemble that optimally explains the density. The method starts from  
541 an initial single-conformer model. The occupancies of all atoms in a residue, *k*, beyond the C $\beta$  atom  
542 are set to zero with phenix.pdbtools, and the model is refined with phenix.refine. Refinement uses  
543 anisotropic B-factors for all residues if the resolution is better than 1.45 Å, or just for residue *k*  
544 otherwise. Finally, all atoms in residue *k* beyond the C $\beta$  atom are removed. These steps result in two  
545 inputs to qFit: (1) an omit map and (2) starting coordinates with an anisotropic tensor for the C $\beta$  atom.

546

547 *qFit part 2: Peptide flips and backbone sampling*

548

549 Next, the peptide from residue  $k$  to  $k+1$  is aligned to the centroids identified from clustering the  
550 Top8000 dataset (see above). We calculate local coordinate frames for the peptide and cluster centers  
551 by orthogonalizing the  $C\alpha_i-C\alpha_{i+1}$  and  $C\alpha_i-O_i$  vectors and taking their cross-product. Each centroid  
552 conformation is then transformed onto the starting peptide using a homogeneous coordinate  
553 transformation, resulting in a candidate flipped alternative conformation.

554

555 Peptide flips do not occur in canonical secondary structure due to steric constraints, so qFit 2.0 does  
556 not attempt them in helices and sheets, as detected by the CCP4 MMDB library [46]. This both avoids  
557 false positives and affords a computational speedup by reducing combinatorics in the selection steps  
558 (see below).

559

560 Next, for each residue  $k$ , a fragment of length 7 centered on residue  $k$  is extracted. For each candidate  
561 conformation (one unflipped plus four flipped), the  $C\beta$  atom is moved along the major and minor axes of  
562 the ellipsoid (six total directions) by a distance determined by the ellipsoid eigenvectors and a scale  
563 value provided by the user. Here we used 0.1, 0.2, and 0.3 for this scale value, and 0.05 for the  
564 optional value for random additions to scale. For glycines, which lack a  $C\beta$  atom, the backbone O atom  
565 is used to define the anisotropic ellipsoid. To preserve the exact geometry of the fragment, we use  
566 inverse kinematics to deform the fragment. The gradient of the distance function is projected onto the  
567 nullspace spanned by the dihedral degrees of freedom of the fragment [9, 10]. These motions further  
568 position backbone atoms to accommodate rotameric sidechain conformations.

569

570 *qFit part 3: Sidechain sampling*

571

572 For small sidechains (Ala, Asn, Asp, Cys, Gly, Iso, Leu, Pro, Ser, Thr, Val), a  $40^\circ$  neighborhood of each  
573 rotameric  $\chi$  dihedral angle, starting at  $-20^\circ$ , is sampled in  $10^\circ$  increments on each of the 35 backbone  
574 conformations. To avoid a combinatorial explosion, large sidechains (Arg, Glu, Gln, His, Lys, Met, Phe,  
575 Trp, Tyr) are sampled hierarchically. First, the backbone and first dihedral angle are sampled similarly  
576 to small sidechains. A larger neighborhood of  $50^\circ$  is sampled in  $4.5^\circ$  increments to avoid missing  
577 conformations that are initially suboptimal but can accommodate better fits for subsequent  $\chi$  angles.  
578 This set is then subjected to the selection procedure, which returns a handful of conformations that fit  
579 the density up to the  $C\gamma$  atom. These selected conformations form the basis for sampling the next  $\chi$   
580 angle using the same parameters. This procedure is repeated until the entire sidechain is built.

581

582 *qFit part 4: Conformer selection*

583

584 For each of the  $N$  conformations sampled for each residue, we calculate an electron density map  $\rho_i^c$ .  
585 We scale the observed electron density map  $\rho^o$  to  $\rho^c$ . We then subject the weighted sum of  $\rho_i^c$  to a  
586 quadratic program (QP) to determine a vector of occupancies  $w^T$  that minimizes the least squares  
587 residuals with respect to the observed electron density:

$$\begin{aligned} \min_w \quad & \left\| \rho^o - \sum_i w_i \rho_i^c \right\|_2 \\ \text{s.t.} \quad & w_i \geq t_{d_{min}}, \quad i = 1, \dots, n \\ & 0 \leq \sum_i w_i \leq 1. \end{aligned}$$

588

589 The residuals are calculated over regularly spaced voxels that are within a resolution-dependent radius  
590  $r$  of any of the sidechain (C $\beta$  and beyond) or carbonyl O atoms. The radius  $r$  (in Å) is determined by  $r =$   
591  $0.7 + (d - 0.6)/3.0$  if  $d < 3.0\text{Å}$ , and  $0.5d$  if  $d \geq 3.0\text{Å}$ , where  $d$  is the resolution in Å.

592

593 The vast number of conformations results in a system that is generally underdetermined. We therefore  
594 enforce sparsity of the solution by introducing a resolution-dependent *threshold* constraint  $0 < t_{d_{min}} \leq 1$   
595 for the occupancies; i.e.,  $w_i > t_{d_{min}}$  for all  $i$ . The threshold constraint prevents overfitting by suppressing  
596 arbitrarily small occupancies that model noise. Together with the constraint that the total occupancy  
597 cannot exceed unity, the threshold also enforces a *cardinality* constraint; i.e., the number of non-zero  
598 occupancies is bounded by the integer part of  $1/t_{d_{min}}$ . In effect, the threshold constraint enforces  
599 selection of an optimal subset in the regression. Note that the two constraints imply  $w_i \in \{0\} \cup [t_{d_{min}}, 1]$ .

600 Introducing binary variables  $z_i \in \{0, 1\}$ , we can rewrite the optimization problem as a mixed integer  
601 quadratic program (MIQP):

$$\begin{aligned} \min_w \quad & \left\| \rho^o - \sum_i w_i \rho_i^c \right\|_2 \\ \text{s.t.} \quad & t_{d_{min}} z_i \leq w_i \leq z_i, \quad i = 1, \dots, n \\ & z_i \in \{0, 1\}^n \\ & 0 \leq \sum_i w_i \leq 1. \end{aligned}$$

602

603 This optimization problem belongs to the class of convex quadratic problems, for which solvers can  
604 find a globally optimal solution. An MIQP is NP-hard. We therefore pre-fit conformers with QP, and  
605 subject all conformations with non-vanishing occupancies to MIQP. While in theory this no longer  
606 guarantees an optimal solution, practice tests on small sets of conformers did not show an effect of pre-  
607 fitting.

608

609 *qFit part 5: Putting the model back together*

610

611 Assembling a consistent, multiconformer model from individually fitted residues requires two steps.  
612 First, backbone heterogeneity can extend over multiple, consecutive residues, each with slightly  
613 different occupancies and/or numbers of conformers. To synchronize the number of conformers and  
614 their occupancies over a fragment of length  $K$  residues consisting of consecutive backbone  
615 multiconformers, we again rely on conformational selection by MIQP. We enumerate all possible  
616 connections between all conformations  $C_i$  of residues  $i = 1, \dots, K$  to obtain  $C_f = \prod_{i=1}^K C_i$   
617 conformations to model this fragment. We subject all  $C_f$  conformations to the MIQP, which selects a  
618 parsimonious ensemble of at most  $1/t_{d_{min}}$  conformations based on optimal fit to the observed electron  
619 density, each with identical occupancy for all atoms in the fragment. Note that  $C_f$  can be quite large,

620 even for modestly long fragments. To avoid a combinatorial explosion, for long fragments we  
621 implemented a divide-and-conquer procedure that fits segments of each fragment with MIQP. The  
622 fitted segments are then combinatorially recombined and again subjected to MIQP to obtain the final  
623 set of conformations for the fragment. The peptide-bond geometry of the output model at this stage of  
624 qFit can be distorted. A later refinement stage with phenix.refine corrects the geometry.

625

626 Second, conformations encoding collective motions are often mutually exclusive.

627 In crystal structures, each internally consistent set of residues is labeled with an alternative  
628 conformation or “altloc” identifier -- a capitalized letter (“A”, “B”, etc.) for multiple conformations or a  
629 blank space (“ ”) for a single conformation. However, the initial model from the preceding steps in the  
630 qFit pipeline has random labels. To identify internally consistent labels, we use a simple downhill  
631 Monte Carlo optimization protocol. The program Label minimizes a simple Lennard-Jones score by  
632 randomly swapping labels between conformations and accepting the change if the score improves.  
633 This is repeated 10,000 times per trial over 10 trials, and the model with the best score is used for  
634 subsequent steps.

635

636 To finalize the model, we first refine the relabeled model with phenix.refine. Next, we remove  
637 conformations that are now indistinguishable from other conformations within predicted coordinate  
638 error, and reset occupancies to sum to unity for each atom. Finally, we refine again, using anisotropic  
639 B-factors if the resolution is better than 1.45 Å.

640

#### 641 Hydrogen treatment

642

643 Hydrogens were placed at nuclear positions for Label in qFit 1.0 and at electron-cloud positions for  
644 Label in qFit 2.0. Correspondingly, for Label in qFit 2.0, hydrogen van der Waals radii were taken from  
645 the new values in Reduce [47], which are intended to match those used in PHENIX. Hydrogens were  
646 absent for all other steps in qFit, including the final refinement step; however, the user is encouraged to  
647 add hydrogens to the final qFit model for their protein of interest and proceed to other analyses. Future  
648 work will update programs for downstream analysis of qFit models such as CONTACT [16] to also use  
649 electron-cloud instead of nuclear hydrogen positions.

650

#### 651 Generating synthetic datasets

652

653 To generate synthetic datasets for testing qFit, we used the protein chains containing the four peptide  
654 flip cluster centroids (3mcw B 101-102, 2ior A 159-160, 2g1u A 51-52, 3g6k F 172-173). We first used  
655 phenix.pdbtools to convert any anisotropic B-factors to isotropic, added 10 Å<sup>2</sup> to each B-factor per Å of  
656 resolution worse than the original structure’s resolution to roughly simulate the general rise of B-factors  
657 with resolution, and placed the chain in a P1 box that comfortably encompassed it. Next we used  
658 phenix.fmodel to calculate structure factors (with the “k\_sol=0.4” and “b\_sol=45” bulk solvent  
659 parameters, and also generating 5% R-free flags) and added 10% noise in complex space with the  
660 sftools utility in CCP4 [46]. This process was repeated for every simulated resolution from 0.9 to 2.0 Å  
661 with a 0.1 Å step size.

662

#### 663 Evaluating true and false positives

664

665 qFit uses an input parameter (MC\_AMPL) to scale the magnitude of movements of the Cβ (or O for  
666 glycines) along the directions dictated by its thermal ellipsoid. As in previous work [10, 16, 26], we

667 explored multiple values for this parameter: 0.1, 0.2, and 0.3. For evaluating results such as true vs.  
668 false positive peptide flips and rotamers here, we considered all three resulting qFit models for each  
669 dataset. This is sensible because an end user of qFit 2.0 will likely reproduce this same protocol (with  
670 a few MC\_AMPL values) and thus have a choice of models to use for developing insights into  
671 conformational heterogeneity and its connection to function. For other analyses, we used the minimum-  
672  $R_{\text{free}}$  qFit model unless otherwise noted.

673

#### 674 Re-refinement with water picking

675

676 To compare R-factors between the deposited models and qFit 2.0, we finalized both models with  
677 phenix.refine for 10 macro-cycles using the same parameters, including the “ordered\_solvent=true”  
678 flag. The resulting R-factors for qFit 2.0 models are similar or slightly better (**Figure 4**).

679

#### 680 Programs and databases

681

682 PHENIX version 1.9-1692 (the most recent official release) [48] was used for all steps of both qFit 1.0  
683 and 2.0. Coordinates and structure factors were obtained from the Protein Data Bank [49]. qFit uses  
684 the following libraries: IBM’s ILOG CPLEX solver for QP and MIQP, which is available free of charge for  
685 academic use, and LoopTK for inverse kinematics calculations [50]. qFit is implemented in parallel; it is  
686 capable of sampling and evaluating conformations for each residue as an independent job on a Linux  
687 cluster. We have implemented job management for qFit on both Oracle/Sun Grid Engine and LSF  
688 Platform.

689

#### 690 **Supplementary Figures**

691

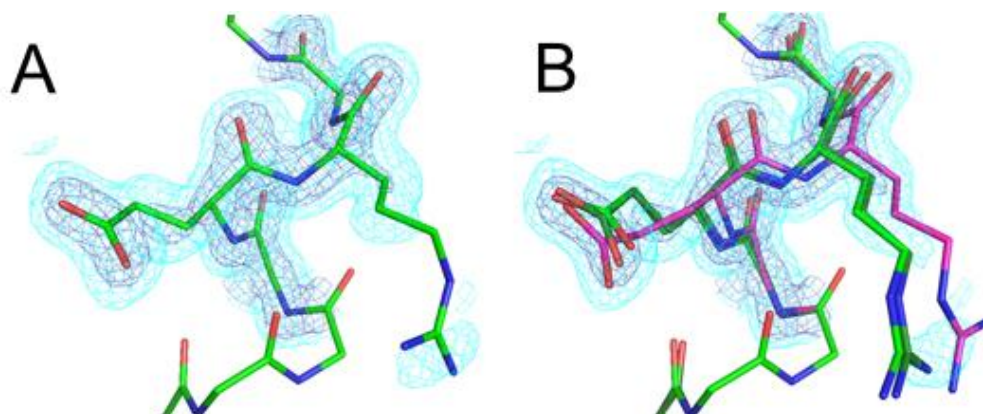

692

693 **Figure S1: qFit detects a shear backbone motion in a room-temperature crystal structure of cyclophilin A.**  
694 **(A)** Residues 142-145 in CypA are modeled with a single conformation in the single-conformer structure (PDB ID  
695 3k0n). The model is a reasonable fit to the 2mFo-DFc electron density contoured at 1.0  $\sigma$  (cyan) and 2.5  $\sigma$  (dark  
696 blue), which is slightly anisotropic for the central carbonyl oxygen. **(B)** The multiconformer qFit model, on the  
697 other hand, includes three alternative conformations with backbones related by a shear-like motion to explain the  
698 electron density. Each shear end-state (greens vs. purple) is allocated about 50% occupancy. The  
699 multiconformer model adds a second rotamer (purple) in addition to the original rotamer (greens) for Glu143 (left-  
700 hand-side of panel) and sweeps the Arg144 sidechain sideways (right-hand-side of panel).

701

702

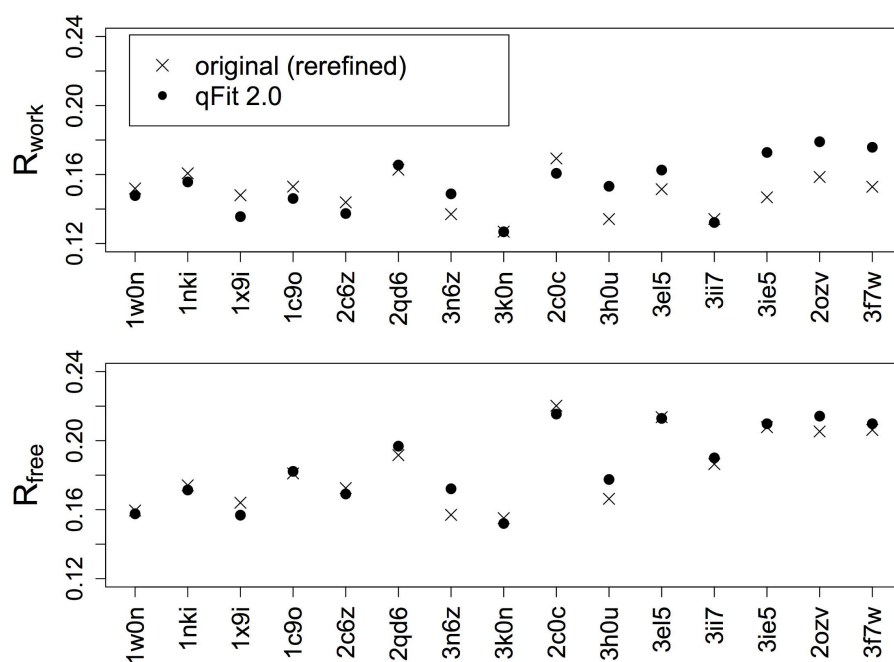

703

704

**Figure S2: Multiconformer modeling with qFit does not result in better crystallographic R-factors before solvent picking.**  $R_{\text{work}}$  and  $R_{\text{free}}$  are plotted vs. PDB ID sorted from high to low resolution. X's indicate original structures re-refined without automated addition and removal of water molecules, and filled circles indicate qFit 2.0 models.

707

708

709

**Table S1: List of peptide flip examples from Top8000 used as training set.**

710

711



## 712 References

713

- 714 1. Smock RG, Gierasch LM. Sending signals dynamically. *Science*. 2009;324(5924):198-203. doi:  
715 10.1126/science.1169377. PubMed PMID: 19359576; PubMed Central PMCID: PMC2921701.
- 716 2. van den Bedem H, Fraser JS. Integrative, dynamic structural biology at atomic resolution-it's  
717 about time. *Nat Methods*. 2015;12(4):307-18. doi: 10.1038/nmeth.3324. PubMed PMID: 25825836.
- 718 3. Woldeyes RA, Sivak DA, Fraser JS. E pluribus unum, no more: from one crystal, many  
719 conformations. *Curr Opin Struct Biol*. 2014;28:56-62. doi: 10.1016/j.sbi.2014.07.005. PubMed PMID:  
720 25113271; PubMed Central PMCID: PMC4253534.
- 721 4. Smith JL, Hendrickson WA, Honzatko RB, Sheriff S. Structural heterogeneity in protein crystals.  
722 *Biochemistry*. 1986;25(18):5018-27. PubMed PMID: 3768328.
- 723 5. Kuzmanic A, Pannu NS, Zagrovic B. X-ray refinement significantly underestimates the level of  
724 microscopic heterogeneity in biomolecular crystals. *Nat Commun*. 2014;5:3220. doi:  
725 10.1038/ncomms4220. PubMed PMID: 24504120; PubMed Central PMCID: PMC3926004.
- 726 6. Lang PT, Ng HL, Fraser JS, Corn JE, Echols N, Sales M, et al. Automated electron-density  
727 sampling reveals widespread conformational polymorphism in proteins. *Protein Sci*. 2010;19(7):1420-  
728 31. doi: 10.1002/pro.423. PubMed PMID: 20499387; PubMed Central PMCID: PMC2974833.
- 729 7. Lang PT, Holton JM, Fraser JS, Alber T. Protein structural ensembles are revealed by  
730 redefining X-ray electron density noise. *Proc Natl Acad Sci U S A*. 2014;111(1):237-42. doi:  
731 10.1073/pnas.1302823110. PubMed PMID: 24363322; PubMed Central PMCID: PMC3890839.
- 732 8. Burnley BT, Afonine PV, Adams PD, Gros P. Modelling dynamics in protein crystal structures by  
733 ensemble refinement. *Elife*. 2012;1:e00311. doi: 10.7554/eLife.00311. PubMed PMID: 23251785;  
734 PubMed Central PMCID: PMC3524795.
- 735 9. van den Bedem H, Lotan I, Latombe JC, Deacon AM. Real-space protein-model completion: an  
736 inverse-kinematics approach. *Acta Crystallogr D Biol Crystallogr*. 2005;61(Pt 1):2-13. doi:  
737 10.1107/S09074444904025697. PubMed PMID: 15608370.
- 738 10. van den Bedem H, Dhanik A, Latombe JC, Deacon AM. Modeling discrete heterogeneity in X-  
739 ray diffraction data by fitting multi-conformers. *Acta Crystallogr D Biol Crystallogr*. 2009;65(Pt 10):1107-  
740 17. doi: 10.1107/S09074444909030613. PubMed PMID: 19770508; PubMed Central PMCID:  
741 PMC2756169.
- 742 11. Lovell SC, Davis IW, Arendall WB, 3rd, de Bakker PI, Word JM, Prisant MG, et al. Structure  
743 validation by C $\alpha$  geometry: phi,psi and C $\beta$  deviation. *Proteins*. 2003;50(3):437-50. doi:  
744 10.1002/prot.10286. PubMed PMID: 12557186.
- 745 12. Lovell SC, Word JM, Richardson JS, Richardson DC. The penultimate rotamer library. *Proteins*.  
746 2000;40(3):389-408. PubMed PMID: 10861930.
- 747 13. Sharp KA, O'Brien E, Kasinath V, Wand AJ. On the relationship between NMR-derived amide  
748 order parameters and protein backbone entropy changes. *Proteins*. 2015;83(5):922-30. doi:  
749 10.1002/prot.24789. PubMed PMID: 25739366; PubMed Central PMCID: PMC4400257.
- 750 14. Davis IW, Arendall WB, 3rd, Richardson DC, Richardson JS. The backrub motion: how protein  
751 backbone shrugs when a sidechain dances. *Structure*. 2006;14(2):265-74. doi:  
752 10.1016/j.str.2005.10.007. PubMed PMID: 16472746.
- 753 15. Fraser JS, Clarkson MW, Degnan SC, Erion R, Kern D, Alber T. Hidden alternative structures of  
754 proline isomerase essential for catalysis. *Nature*. 2009;462(7273):669-73. doi: 10.1038/nature08615.  
755 PubMed PMID: 19956261; PubMed Central PMCID: PMC2805857.
- 756 16. van den Bedem H, Bhabha G, Yang K, Wright PE, Fraser JS. Automated identification of  
757 functional dynamic contact networks from X-ray crystallography. *Nat Methods*. 2013;10(9):896-902. doi:  
758 10.1038/nmeth.2592. PubMed PMID: 23913260; PubMed Central PMCID: PMC3760795.
- 759 17. Jones TA, Zou JY, Cowan SW, Kjeldgaard M. Improved methods for building protein models in  
760 electron density maps and the location of errors in these models. *Acta Crystallogr A*. 1991;47 ( Pt  
761 2):110-9. PubMed PMID: 2025413.
- 762 18. Kleywegt GJ, Jones TA. Efficient rebuilding of protein structures. *Acta Crystallogr D Biol*  
763 *Crystallogr*. 1996;52(Pt 4):829-32. doi: 10.1107/S09074444996001783. PubMed PMID: 15299648.

- 764 19. Ludwig ML, Patridge KA, Metzger AL, Dixon MM, Eren M, Feng Y, et al. Control of oxidation-  
765 reduction potentials in flavodoxin from *Clostridium beijerinckii*: the role of conformation changes.  
766 *Biochemistry*. 1997;36(6):1259-80. doi: 10.1021/bi962180o. PubMed PMID: 9063874.
- 767 20. Milner-White JE, Watson JD, Qi G, Hayward S. Amyloid formation may involve alpha- to beta  
768 sheet interconversion via peptide plane flipping. *Structure*. 2006;14(9):1369-76. doi:  
769 10.1016/j.str.2006.06.016. PubMed PMID: 16962968.
- 770 21. Richardson JS, Richardson DC. Amino acid preferences for specific locations at the ends of  
771 alpha helices. *Science*. 1988;240(4859):1648-52. PubMed PMID: 3381086.
- 772 22. Yan BX, Sun YQ. Glycine residues provide flexibility for enzyme active sites. *J Biol Chem*.  
773 1997;272(6):3190-4. PubMed PMID: 9013553.
- 774 23. Keedy DA, Kenner LR, Warkentin M, Woldeyes R, Thompson MC, Brewster AS, et al. Mapping  
775 the Conformational Landscape of a Dynamic Enzyme by XFEL and Multitemperature  
776 Crystallography2015 2015-01-01 00:00:00.
- 777 24. Arnlund D, Johansson LC, Wickstrand C, Barty A, Williams GJ, Malmerberg E, et al. Visualizing  
778 a protein quake with time-resolved X-ray scattering at a free-electron laser. *Nat Methods*.  
779 2014;11(9):923-6. doi: 10.1038/nmeth.3067. PubMed PMID: 25108686; PubMed Central PMCID:  
780 PMC4149589.
- 781 25. Fraser JS, van den Bedem H, Samelson AJ, Lang PT, Holton JM, Echols N, et al. Accessing  
782 protein conformational ensembles using room-temperature X-ray crystallography. *Proc Natl Acad Sci U*  
783 *S A*. 2011;108(39):16247-52. doi: 10.1073/pnas.1111325108. PubMed PMID: 21918110; PubMed  
784 Central PMCID: PMC3182744.
- 785 26. Keedy DA, van den Bedem H, Sivak DA, Petsko GA, Ringe D, Wilson MA, et al. Crystal  
786 cryocooling distorts conformational heterogeneity in a model Michaelis complex of DHFR. *Structure*.  
787 2014;22(6):899-910. doi: 10.1016/j.str.2014.04.016. PubMed PMID: 24882744; PubMed Central  
788 PMCID: PMC4082491.
- 789 27. Fonseca R, Pachov DV, Bernauer J, van den Bedem H. Characterizing RNA ensembles from  
790 NMR data with kinematic models. *Nucleic Acids Res*. 2014;42(15):9562-72. doi: 10.1093/nar/gku707.  
791 PubMed PMID: 25114056; PubMed Central PMCID: PMC4150802.
- 792 28. Fenwick RB, Orellana L, Esteban-Martin S, Orozco M, Salvatella X. Correlated motions are a  
793 fundamental property of beta-sheets. *Nat Commun*. 2014;5:4070. doi: 10.1038/ncomms5070. PubMed  
794 PMID: 24915882.
- 795 29. Hallen MA, Keedy DA, Donald BR. Dead-end elimination with perturbations (DEEPer): a  
796 provable protein design algorithm with continuous sidechain and backbone flexibility. *Proteins*.  
797 2013;81(1):18-39. doi: 10.1002/prot.24150. PubMed PMID: 22821798; PubMed Central PMCID:  
798 PMC3491125.
- 799 30. Smith CA, Kortemme T. Backrub-like backbone simulation recapitulates natural protein  
800 conformational variability and improves mutant side-chain prediction. *J Mol Biol*. 2008;380(4):742-56.  
801 doi: 10.1016/j.jmb.2008.05.023. PubMed PMID: 18547585; PubMed Central PMCID: PMC2603262.
- 802 31. Hayward S. Peptide-plane flipping in proteins. *Protein Sci*. 2001;10(11):2219-27. doi:  
803 10.1110/ps.23101. PubMed PMID: 11604529; PubMed Central PMCID: PMC2374056.
- 804 32. Gunasekaran K, Gomathi L, Ramakrishnan C, Chandrasekhar J, Balaram P. Conformational  
805 interconversions in peptide beta-turns: analysis of turns in proteins and computational estimates of  
806 barriers. *J Mol Biol*. 1998;284(5):1505-16. doi: 10.1006/jmbi.1998.2154. PubMed PMID: 9878367.
- 807 33. Chen VB, Arendall WB, 3rd, Headd JJ, Keedy DA, Immormino RM, Kapral GJ, et al. MolProbity:  
808 all-atom structure validation for macromolecular crystallography. *Acta Crystallogr D Biol Crystallogr*.  
809 2010;66(Pt 1):12-21. doi: 10.1107/S09074444909042073. PubMed PMID: 20057044; PubMed Central  
810 PMCID: PMC2803126.
- 811 34. Nicholson LK, Yamazaki T, Torchia DA, Grzesiek S, Bax A, Stahl SJ, et al. Flexibility and  
812 function in HIV-1 protease. *Nat Struct Biol*. 1995;2(4):274-80. PubMed PMID: 7796263.
- 813 35. Torbeev VY, Raghuraman H, Hamelberg D, Tonelli M, Westler WM, Perozo E, et al. Protein  
814 conformational dynamics in the mechanism of HIV-1 protease catalysis. *Proc Natl Acad Sci U S A*.  
815 2011;108(52):20982-7. doi: 10.1073/pnas.1111202108. PubMed PMID: 22158985; PubMed Central  
816 PMCID: PMC3248522.

- 817 36. Scott WR, Schiffer CA. Curling of flap tips in HIV-1 protease as a mechanism for substrate entry  
818 and tolerance of drug resistance. *Structure*. 2000;8(12):1259-65. PubMed PMID: 11188690.
- 819 37. Keedy DA, Georgiev I, Triplett EB, Donald BR, Richardson DC, Richardson JS. The role of local  
820 backrub motions in evolved and designed mutations. *PLoS Comput Biol*. 2012;8(8):e1002629. doi:  
821 10.1371/journal.pcbi.1002629. PubMed PMID: 22876172; PubMed Central PMCID: PMC3410847.
- 822 38. Georgiev I, Keedy D, Richardson JS, Richardson DC, Donald BR. Algorithm for backrub  
823 motions in protein design. *Bioinformatics*. 2008;24(13):i196-204. doi: 10.1093/bioinformatics/btn169.  
824 PubMed PMID: 18586714; PubMed Central PMCID: PMC2718647.
- 825 39. Harbury PB, Plecs JJ, Tidor B, Alber T, Kim PS. High-resolution protein design with backbone  
826 freedom. *Science*. 1998;282(5393):1462-7. PubMed PMID: 9822371.
- 827 40. Deis LN, Pemble CWt, Qi Y, Hagarman A, Richardson DC, Richardson JS, et al. Multiscale  
828 conformational heterogeneity in staphylococcal protein a: possible determinant of functional plasticity.  
829 *Structure*. 2014;22(10):1467-77. doi: 10.1016/j.str.2014.08.014. PubMed PMID: 25295398; PubMed  
830 Central PMCID: PMC4191857.
- 831 41. Frauenfelder H, Sligar SG, Wolynes PG. The energy landscapes and motions of proteins.  
832 *Science*. 1991;254(5038):1598-603. PubMed PMID: 1749933.
- 833 42. Kohlhoff KJ, Shukla D, Lawrenz M, Bowman GR, Konerding DE, Belov D, et al. Cloud-based  
834 simulations on Google Exacycle reveal ligand modulation of GPCR activation pathways. *Nat Chem*.  
835 2014;6(1):15-21. doi: 10.1038/nchem.1821. PubMed PMID: 24345941; PubMed Central PMCID:  
836 PMC3923464.
- 837 43. Richardson JS, Keedy DA, Richardson DC. "THE PLOT" THICKENS: MORE DATA, MORE  
838 DIMENSIONS, MORE USES. *Biomolecular Forms and Functions: A Celebration of 50 Years of the*  
839 *Ramachandran Map*. 2013:46.
- 840 44. Word JM, Lovell SC, LaBean TH, Taylor HC, Zalis ME, Presley BK, et al. Visualizing and  
841 quantifying molecular goodness-of-fit: small-probe contact dots with explicit hydrogen atoms. *J Mol Biol*.  
842 1999;285(4):1711-33. doi: 10.1006/jmbi.1998.2400. PubMed PMID: 9917407.
- 843 45. Rivals I, Personnaz L, Taing L, Potier MC. Enrichment or depletion of a GO category within a  
844 class of genes: which test? *Bioinformatics*. 2007;23(4):401-7. doi: 10.1093/bioinformatics/btl633.  
845 PubMed PMID: 17182697.
- 846 46. Winn MD, Ballard CC, Cowtan KD, Dodson EJ, Emsley P, Evans PR, et al. Overview of the  
847 CCP4 suite and current developments. *Acta Crystallogr D Biol Crystallogr*. 2011;67(Pt 4):235-42. doi:  
848 10.1107/S0907444910045749. PubMed PMID: 21460441; PubMed Central PMCID: PMC3069738.
- 849 47. Word JM, Lovell SC, Richardson JS, Richardson DC. Asparagine and glutamine: using  
850 hydrogen atom contacts in the choice of side-chain amide orientation. *J Mol Biol*. 1999;285(4):1735-47.  
851 doi: 10.1006/jmbi.1998.2401. PubMed PMID: 9917408.
- 852 48. Adams PD, Afonine PV, Bunkoczi G, Chen VB, Davis IW, Echols N, et al. PHENIX: a  
853 comprehensive Python-based system for macromolecular structure solution. *Acta Crystallogr D Biol*  
854 *Crystallogr*. 2010;66(Pt 2):213-21. doi: 10.1107/S0907444909052925. PubMed PMID: 20124702;  
855 PubMed Central PMCID: PMC2815670.
- 856 49. Berman HM, Battistuz T, Bhat TN, Bluhm WF, Bourne PE, Burkhardt K, et al. The Protein Data  
857 Bank. *Acta Crystallogr D Biol Crystallogr*. 2002;58(Pt 6 No 1):899-907. PubMed PMID: 12037327.
- 858 50. Yao P, Dhanik A, Marz N, Propper R, Kou C, Liu G, et al. Efficient algorithms to explore  
859 conformation spaces of flexible protein loops. *IEEE/ACM Trans Comput Biol Bioinform*. 2008;5(4):534-  
860 45. doi: 10.1109/TCBB.2008.96. PubMed PMID: 18989041; PubMed Central PMCID: PMC2794838.
- 861
